# Supplementary material
Source: ML conference proceedings conference paper supplement (https://openreview.net/forum?id=WwHNwvbQMh)

# DiffOG: Differentiable Policy Trajectory Optimization with Generalizability

Zhengtong Xu, Zichen Miao, Qiang Qiu, Zhe Zhang, Yu She  
{xu1703, miaozi, qqiu, zhan5111, shey}@purdue.edu

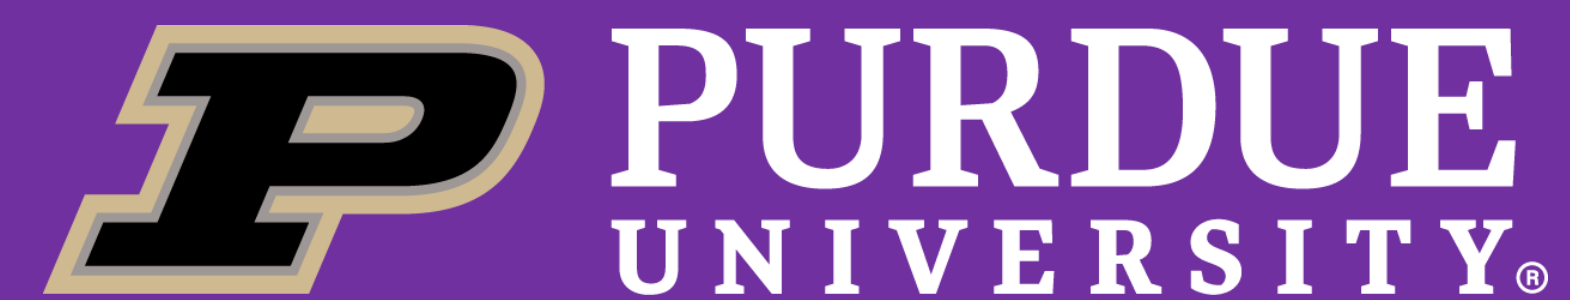

## Method

We introduce DiffOG, a learning-based trajectory optimizer that enhances visuomotor policies by integrating a differentiable transformer-based optimization layer. DiffOG produces smoother, constraint-compliant, and more interpretable action trajectories.

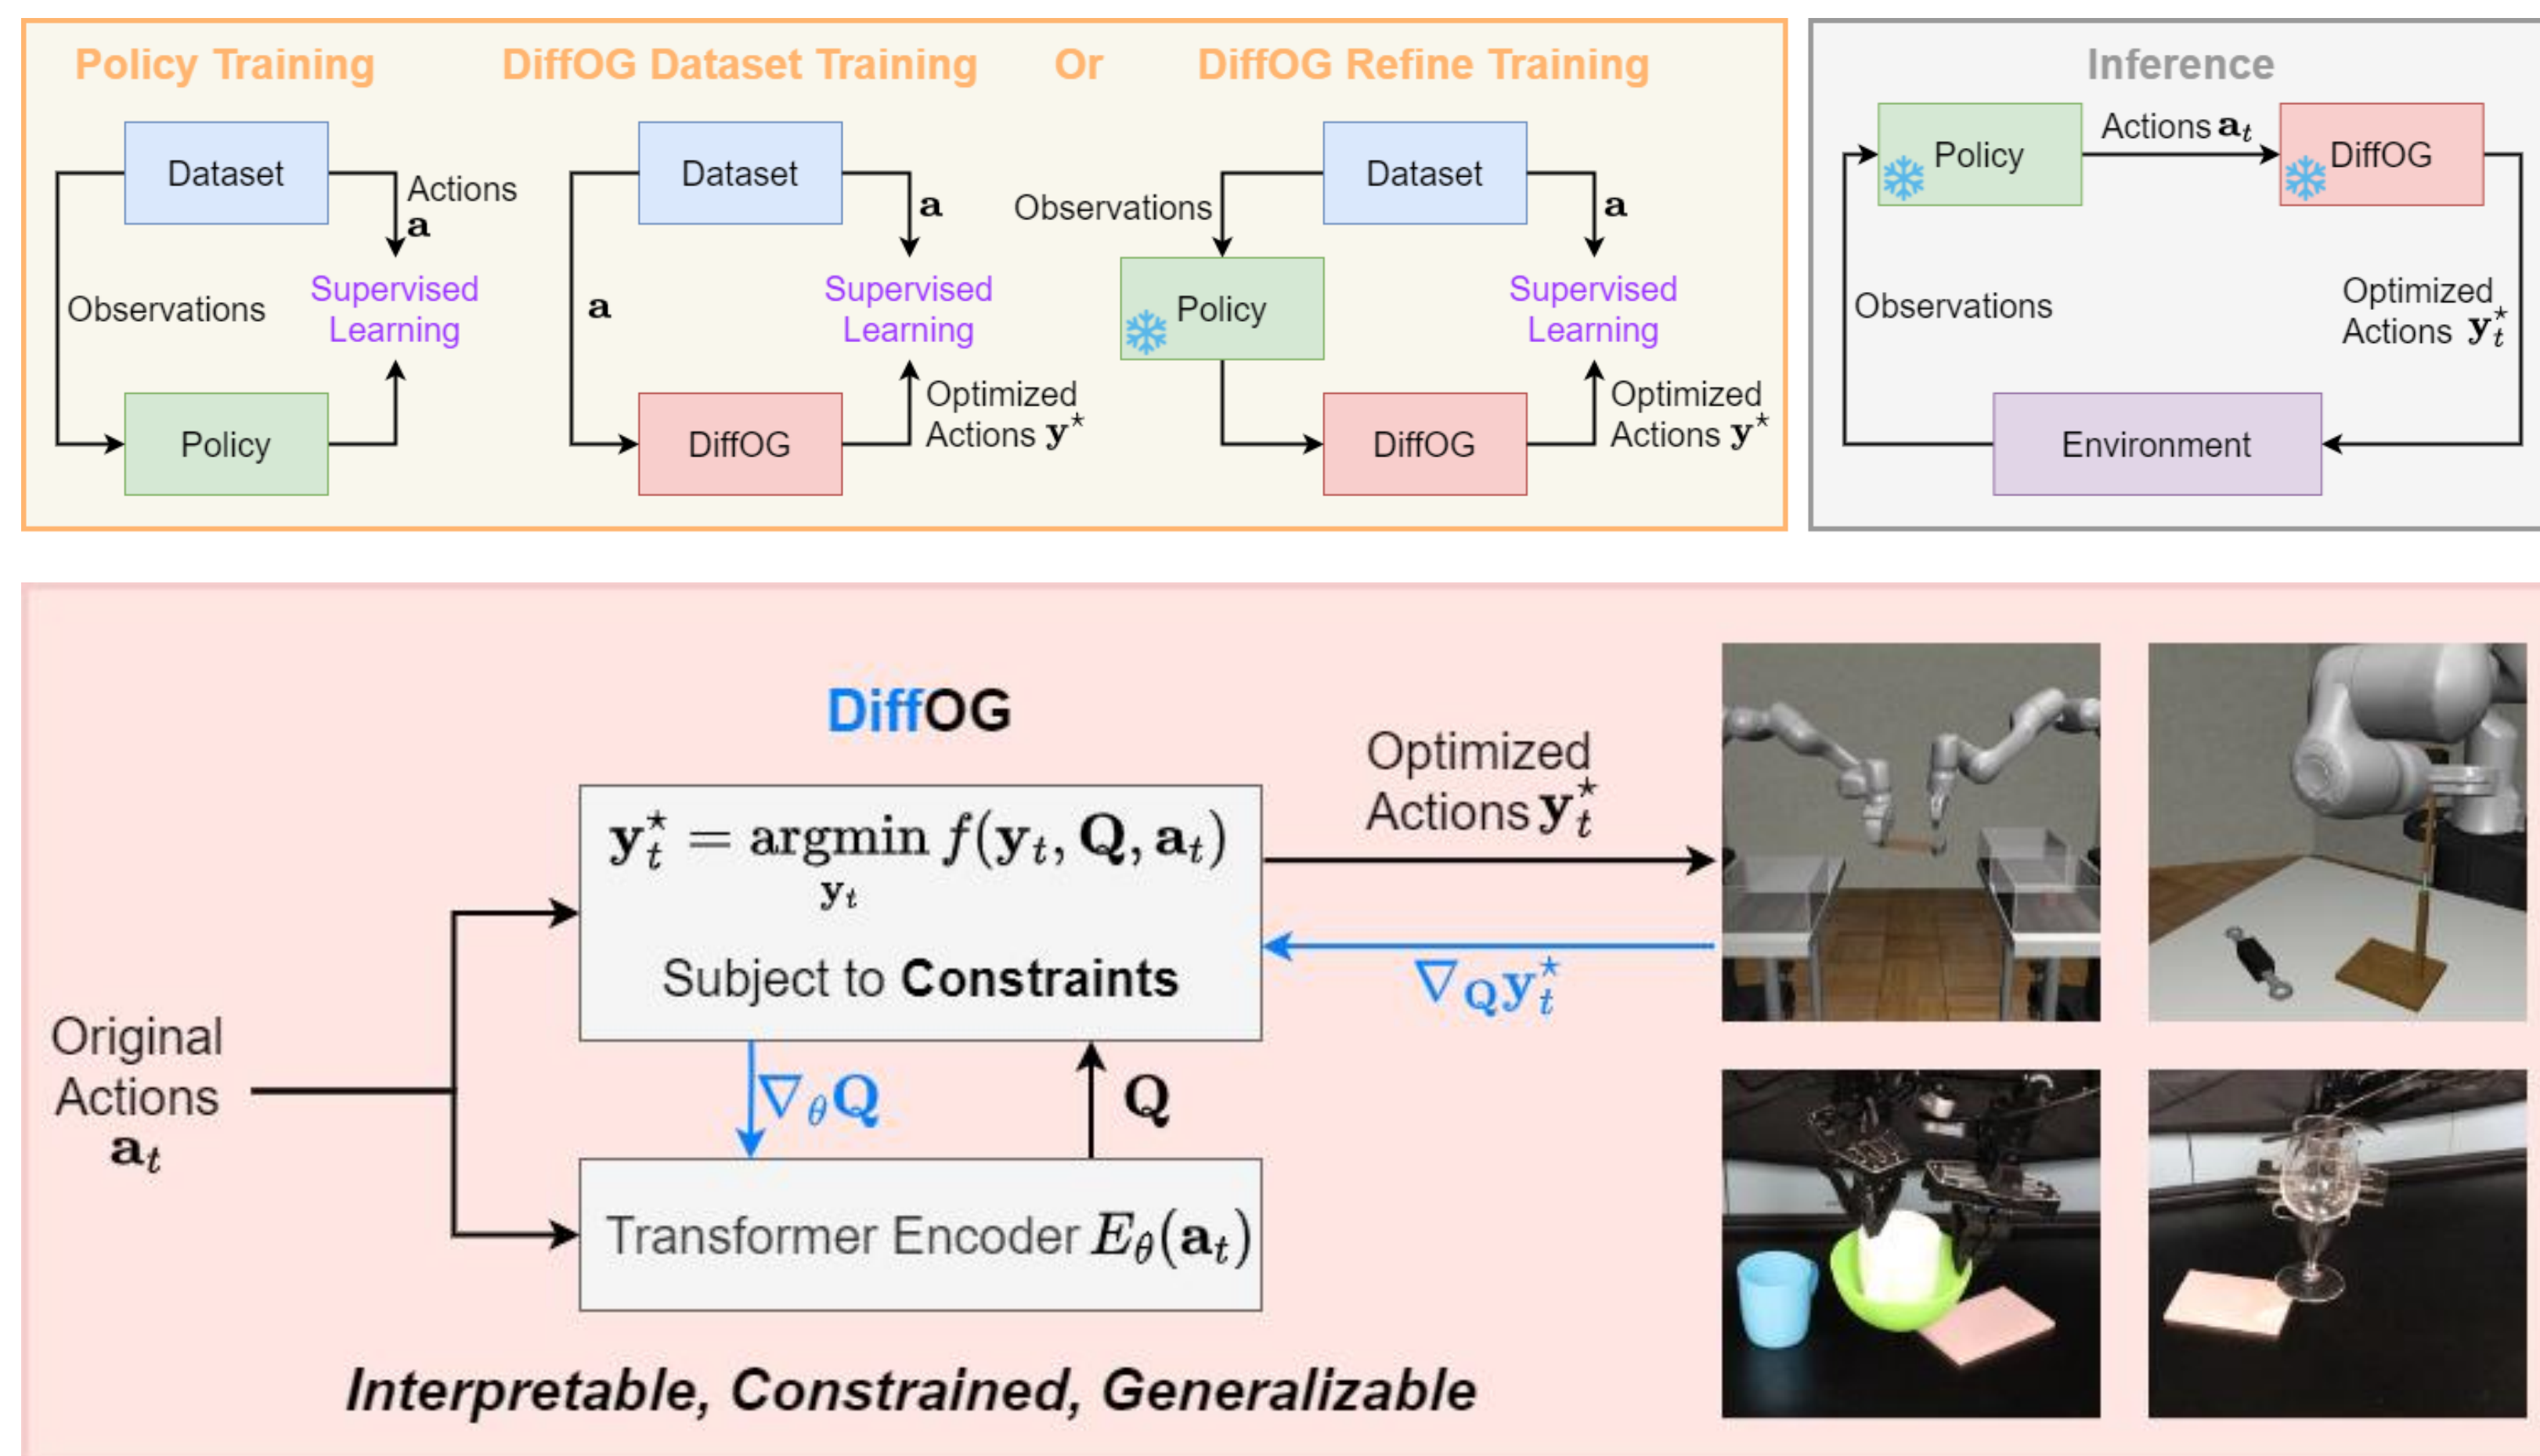

## Adjustability of Trajectory

Visuomotor policies typically lack mechanisms for directly influencing the properties of the generated actions through parameter adjustment. DiffOG offers interpretability, enabling flexible and direct modulation of action trajectory characteristics.

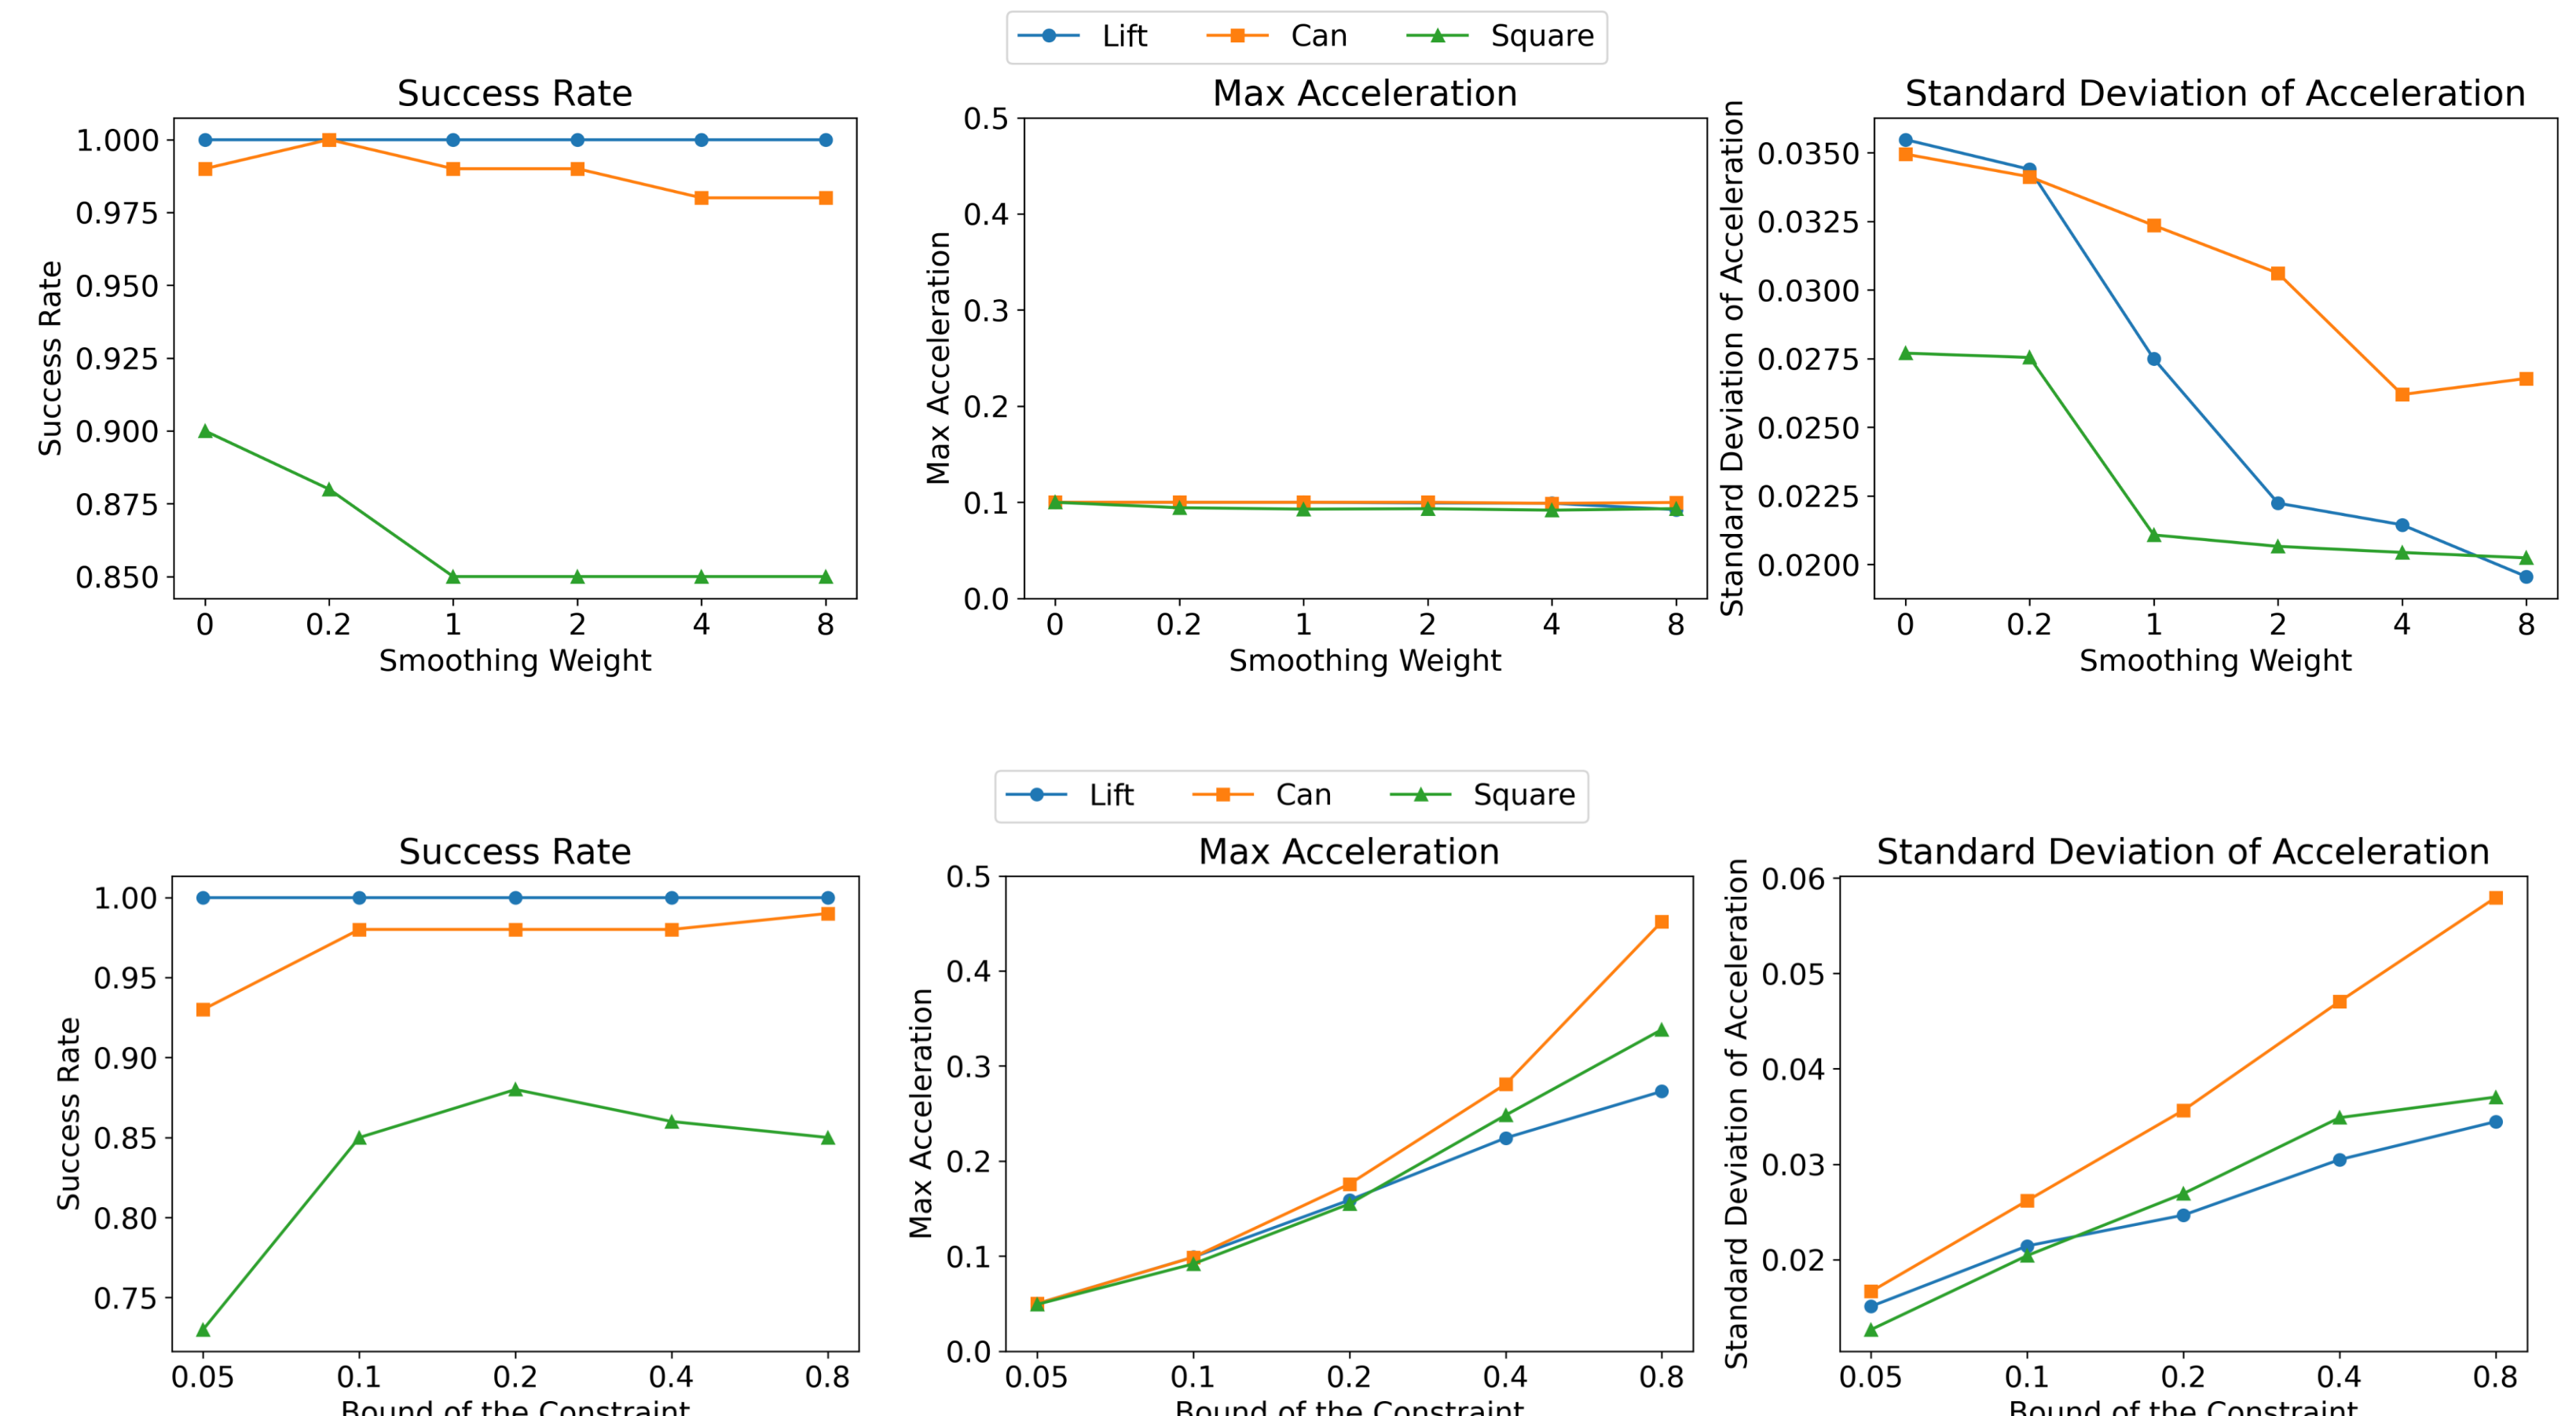

## Benchmark Results

Benchmark on Visual Imitation learning

|                               | Lift               | Can                | Square             | Tool Hang          | Transport          | Push-T             |
|-------------------------------|--------------------|--------------------|--------------------|--------------------|--------------------|--------------------|
| Base Policy: Diffusion Policy | 1.00 ± 0.00        | 0.98 ± 0.01        | 0.91 ± 0.01        | 0.83 ± 0.03        | 0.91 ± 0.01        | 0.84 ± 0.03        |
| DiffOG Dataset (Ours)         | <b>1.00 ± 0.00</b> | <b>0.98 ± 0.01</b> | 0.87 ± 0.02        | <b>0.82 ± 0.02</b> | 0.89 ± 0.02        | <b>0.83 ± 0.02</b> |
| DiffOG Refine (Ours)          | <b>1.00 ± 0.00</b> | <b>0.98 ± 0.01</b> | <b>0.90 ± 0.01</b> | 0.81 ± 0.02        | <b>0.91 ± 0.03</b> | 0.80 ± 0.02        |
| Constraint Clipping           | <b>1.00 ± 0.00</b> | 0.93 ± 0.04        | 0.78 ± 0.03        | 0.59 ± 0.03        | 0.82 ± 0.02        | 0.82 ± 0.02        |
| Penalty-Based Optimization    | <b>1.00 ± 0.00</b> | 0.96 ± 0.02        | 0.76 ± 0.03        | 0.79 ± 0.01        | 0.81 ± 0.02        | 0.81 ± 0.04        |

Benchmark on 3D Imitation learning

|                            | Pick Place Wall    | Shelf Place        | Disassemble        | Stick Push         | Stick Pull         |
|----------------------------|--------------------|--------------------|--------------------|--------------------|--------------------|
| Base Policy: DP3           | 0.98 ± 0.01        | 0.77 ± 0.04        | 0.87 ± 0.02        | 1.00 ± 0.00        | 0.70 ± 0.02        |
| DiffOG Dataset (Ours)      | <b>0.98 ± 0.01</b> | <b>0.73 ± 0.01</b> | 0.89 ± 0.05        | <b>1.00 ± 0.00</b> | <b>0.70 ± 0.03</b> |
| DiffOG Refine (Ours)       | <b>0.98 ± 0.01</b> | 0.72 ± 0.02        | <b>0.90 ± 0.03</b> | <b>1.00 ± 0.00</b> | 0.68 ± 0.02        |
| Constraint Clipping        | <b>0.98 ± 0.01</b> | 0.70 ± 0.01        | 0.86 ± 0.05        | <b>1.00 ± 0.00</b> | 0.69 ± 0.02        |
| Penalty-Based Optimization | <b>0.98 ± 0.01</b> | 0.67 ± 0.03        | 0.86 ± 0.06        | <b>1.00 ± 0.00</b> | <b>0.70 ± 0.03</b> |

Comparison of Standard Deviations of Acceleration

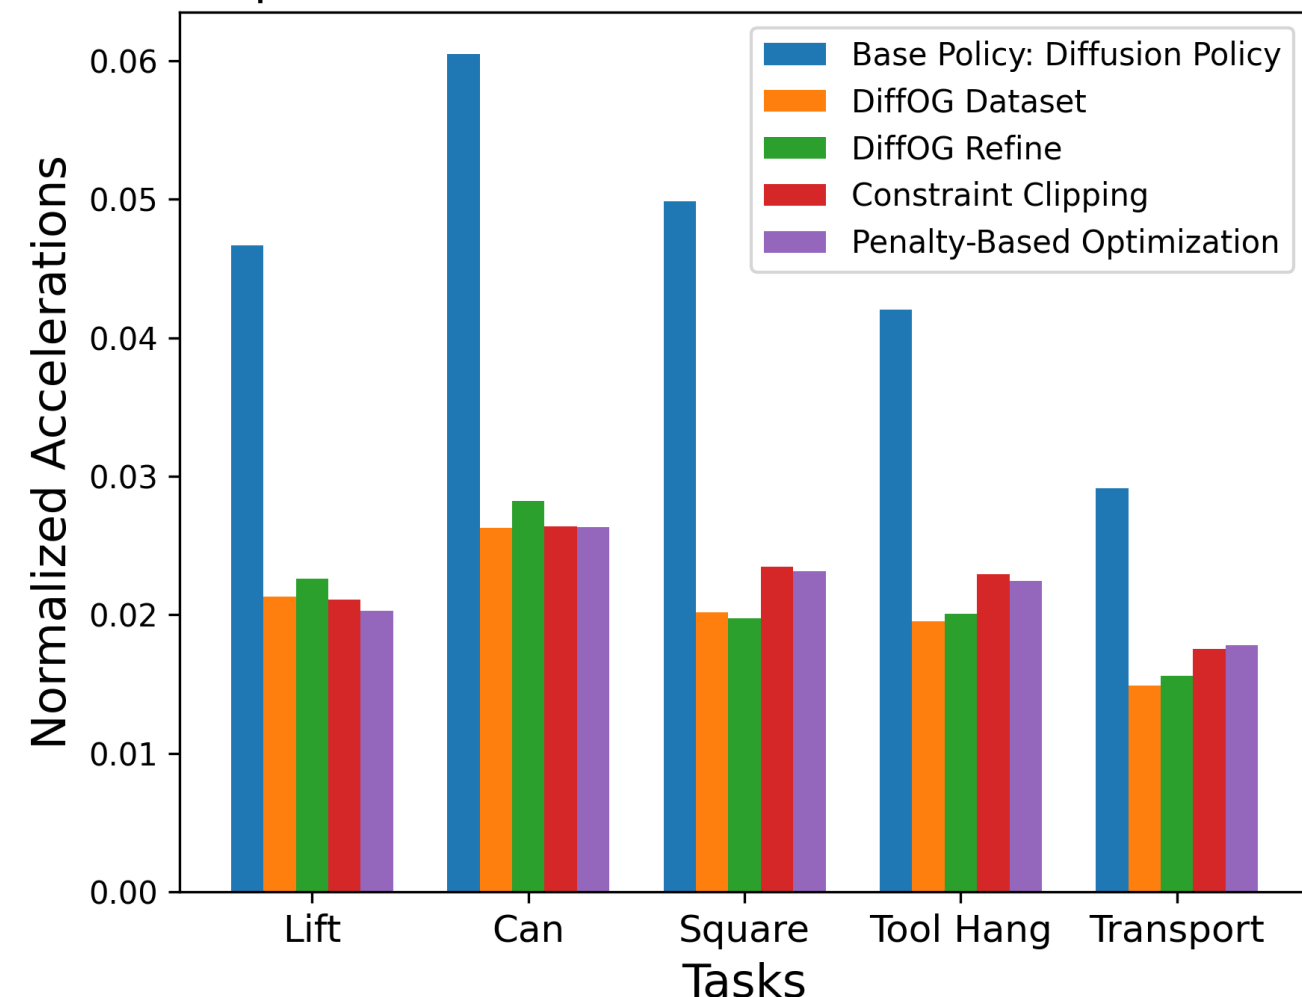

Comparison of Max Accelerations

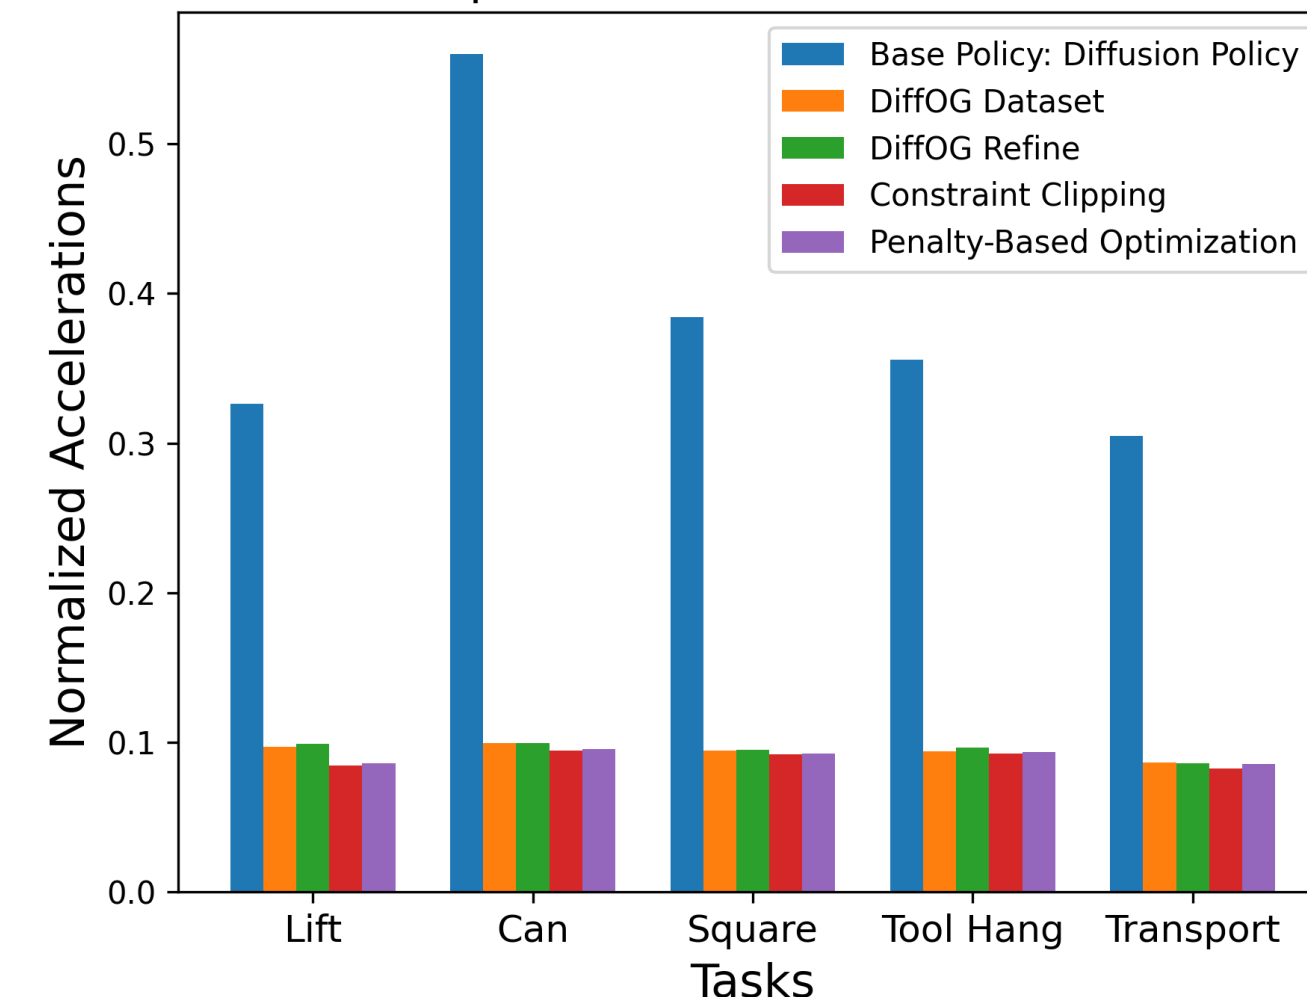

Comparison of Max Velocities

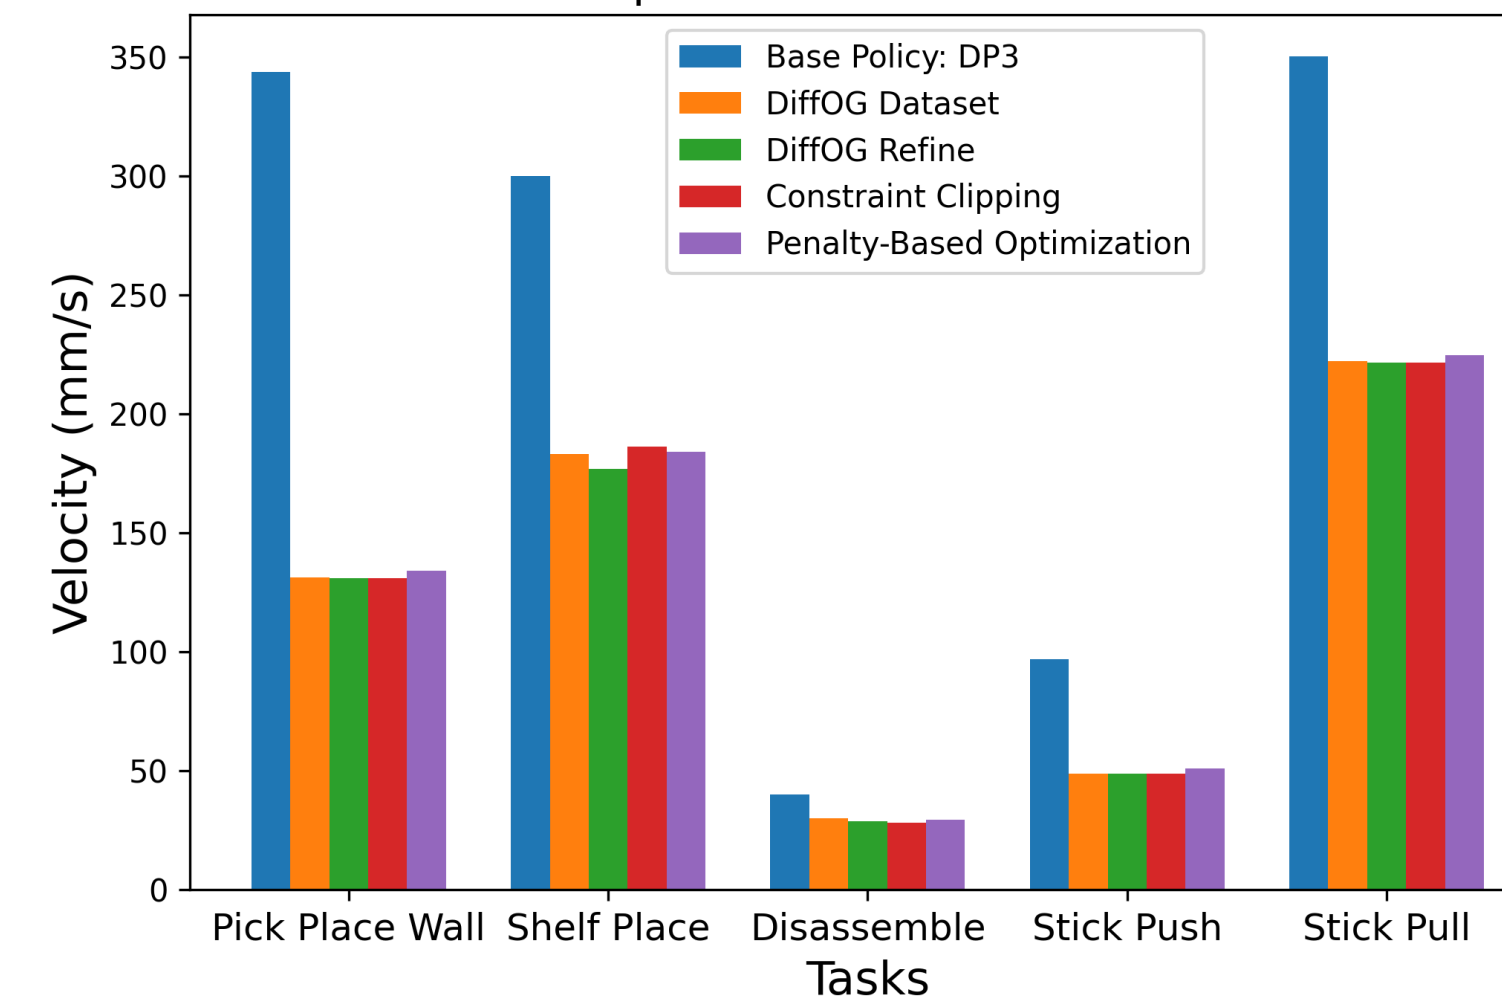

Comparison of Standard Deviations of Velocity

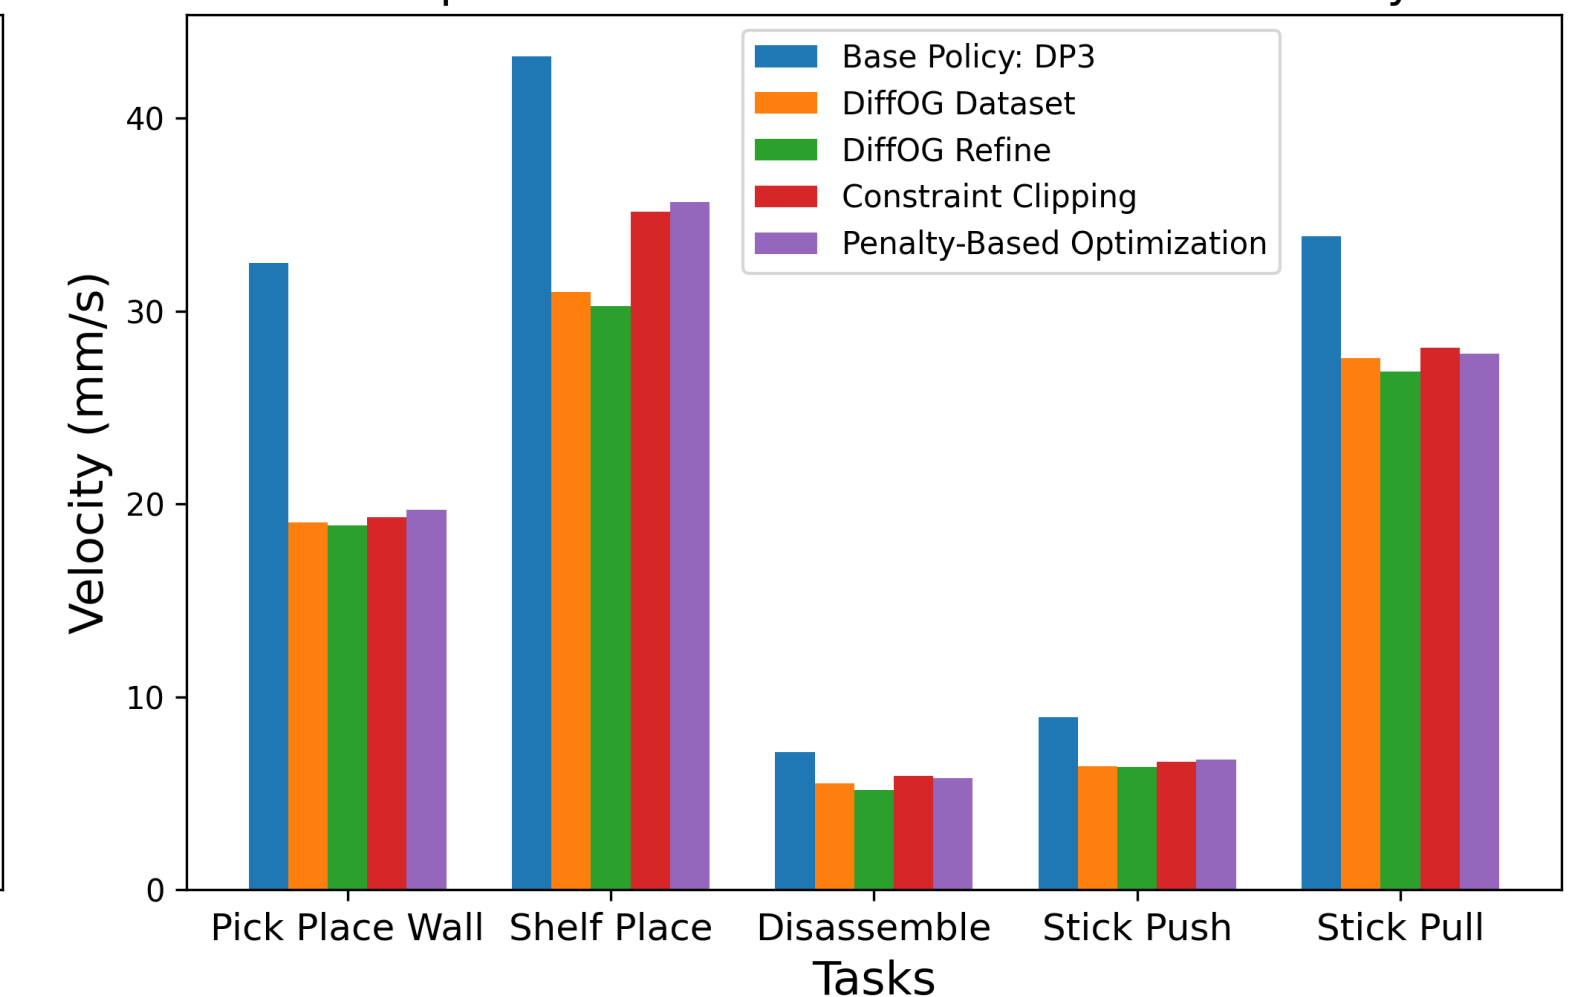

Benchmark on Real-world Tasks

|                | Base Policy: Diffusion Policy | DiffOG Dataset | Constraint Clipping | Penalty-Based Optimizaion |
|----------------|-------------------------------|----------------|---------------------|---------------------------|
| Arrange Desk   | 9/15                          | 9/15           | 2/15                | 4/15                      |
| Move the Stack | 3/15                          | 10/15          | 6/15                | 7/15                      |

Maximum Velocities

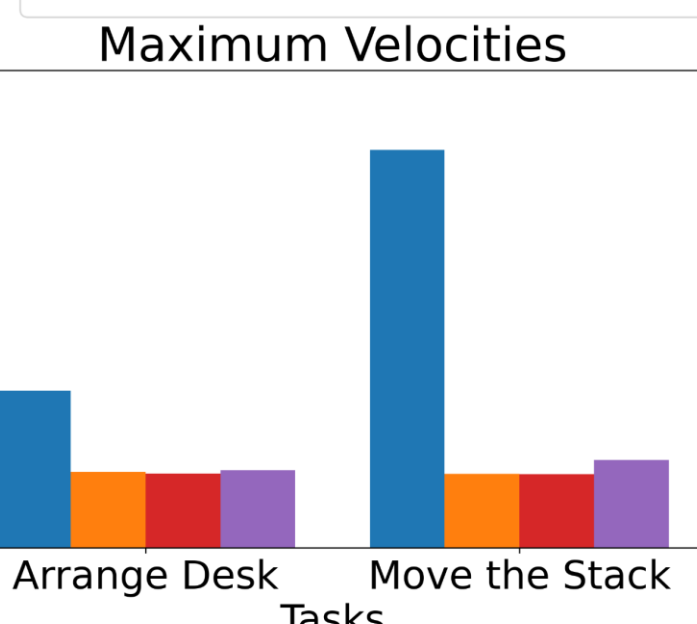

Maximum Accelerations

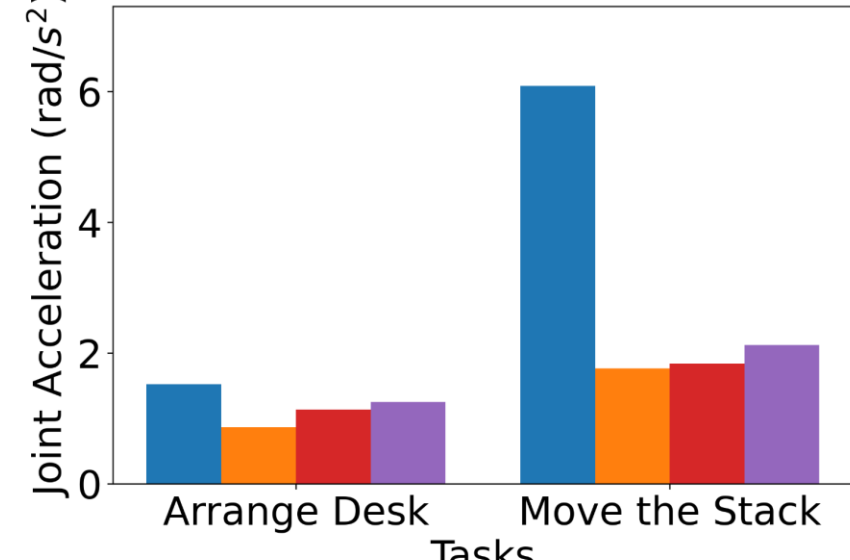

Standard Deviations of Velocity

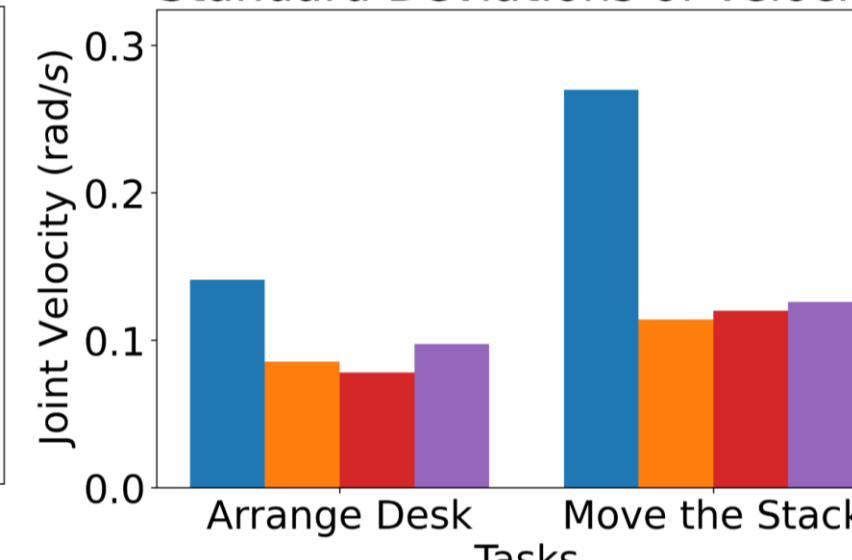

Standard Deviations of Acceleration

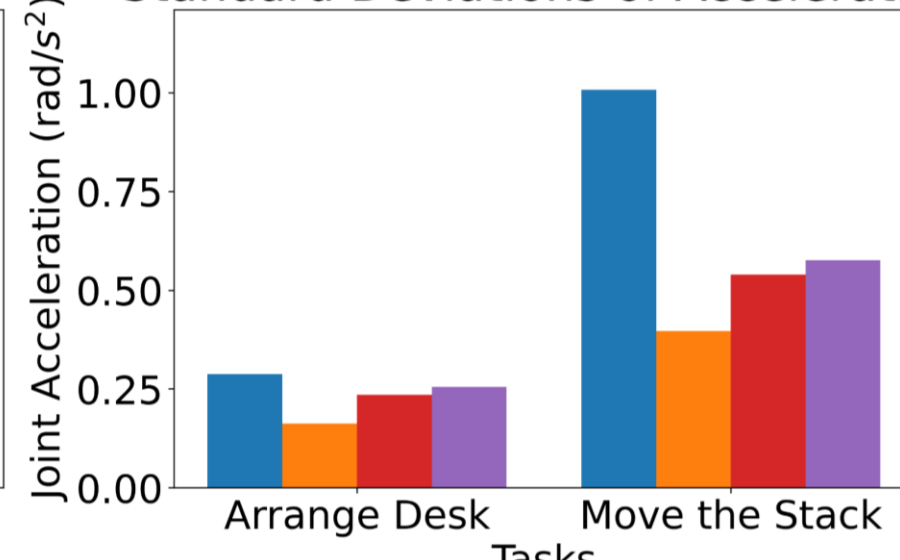

Check out the  
project website!

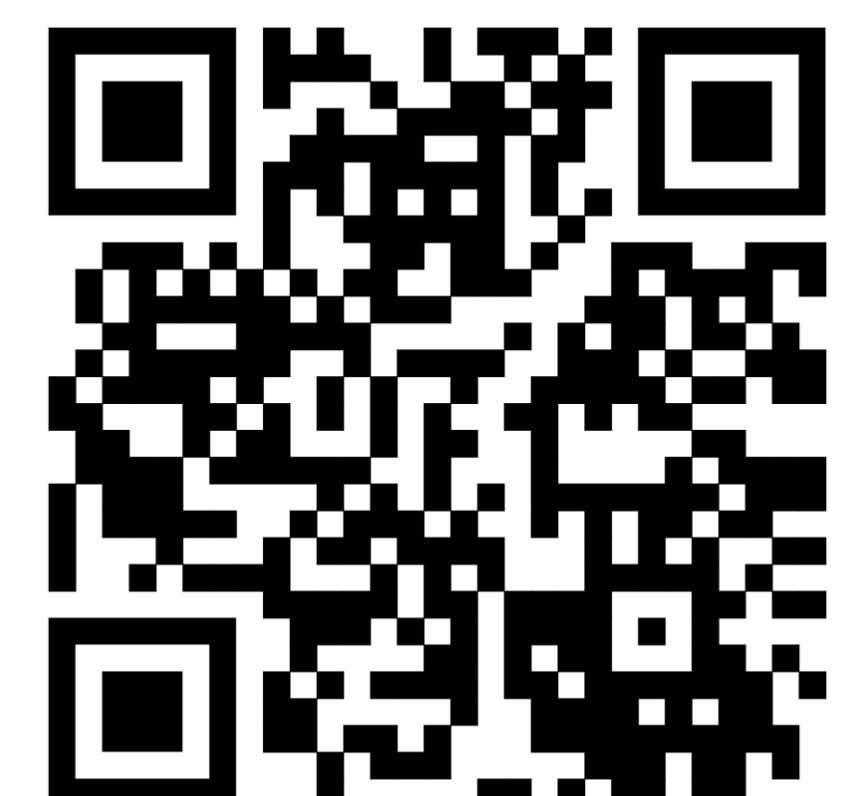

Supplement: supplementary_material [file attachment]
